1     **CRF<sub>1</sub> receptor-dependent increases in irritability-like behavior during abstinence from**  
2                                   **chronic intermittent ethanol vapor exposure**

3  
4     **Adam Kimbrough, Ph.D., Giordano de Guglielmo, Ph.D., Jenni Kononoff, Ph.D., Marsida**  
5                                   **Kallupi, Ph.D., Eric P. Zorrilla, Ph.D., Olivier George, Ph.D.**

6  
7     Department of Neuroscience, The Scripps Research Institute, La Jolla, California 92037

8  
9     \*Correspondence should be addressed to

10    Dr. Olivier George, <sup>1</sup>Department of Neuroscience, The Scripps Research Institute, 10550 North  
11    Torrey Pines Road, SP30-2400, La Jolla, CA 92037. E-mail: [ogearge@scripps.edu](mailto:ogearge@scripps.edu). Phone: +1-  
12    858-784-9039 ; Fax: 858-784-7405

13  
14    This work was supported by National Institutes of Health grants AA006420, AA020608,  
15    AA022977, and AA007456 and the Pearson Center for Alcoholism and Addiction Research. The  
16    content is solely the responsibility of the authors and does not necessarily represent the official  
17    views of the National Institutes of Health.

18  
19  
20

21 **Abstract**

22 **Background:** In humans, emotional and physical signs of withdrawal from ethanol are  
23 commonly seen. Many of these symptoms, including anxiety-like and depression-like behavior,  
24 have been characterized in animal models of ethanol dependence. One issue with several current  
25 behavioral tests measuring withdrawal in animal models is they are often not repeatable within  
26 subjects over time. Additionally, irritability, one of the most common symptoms of ethanol  
27 withdrawal in humans, has not been well characterized in animal models. The corticotropin-  
28 releasing factor (CRF)-CRF<sub>1</sub> receptor system has been suggested to be critical for the emergence  
29 of anxiety-like behavior in ethanol dependence, but the role of this system in irritability-like  
30 behavior has not been characterized. **Methods:** The present study compared the effects of  
31 chronic intermittent ethanol vapor exposure (CIE)-induced ethanol dependence on irritability-  
32 like behavior in rats using the bottle-brush test during acute withdrawal and protracted  
33 abstinence. Rats were trained to self-administer ethanol in operant chambers and then either left  
34 in a nondependent state or made dependent via CIE. Naive, nondependent, and dependent rats  
35 were tested for irritability-like behavior in the bottle-brush test 8 h and 2 weeks into abstinence  
36 from ethanol. A separate cohort of dependent rats was used to examine the effect of the specific  
37 CRF<sub>1</sub> receptor antagonist R121919 on irritability-like behavior. **Results:** Dependent rats  
38 exhibited escalated ethanol intake compared with their own pre-CIE baseline and nondependent  
39 rats. At both time-points of abstinence, ethanol-dependent rats exhibited increased aggressive-  
40 like responses compared with naive and nondependent rats. R121919 blocked the increased  
41 irritability-like behavior in dependent rats. **Conclusions:** The effect of R121919 to block  
42 increased irritability-like behavior suggests that CRF plays an important role in this behavior,  
43 similar to other negative emotional withdrawal symptoms. Quantifying and understanding the

44 molecular basis of irritability-like behavior may yield new insights into withdrawal from ethanol  
45 and other drugs of abuse.

46

47 **Keywords:** ethanol, dependence, chronic intermittent ethanol, irritability, corticotropin-releasing  
48 factor

49

50

51 **Introduction**

52 Alcoholism is a chronic relapsing disorder associated with compulsive drinking, the loss  
53 of control over intake, and the emergence of a negative emotional state during abstinence (Koob  
54 et al., 2004, Koob and Volkow, 2010). In humans, the emotional and physical signs of ethanol  
55 withdrawal include anxiety, irritability, mood swings, insomnia, tremors, convulsions, higher  
56 blood pressure, accelerated pulse, accelerated breathing, accelerated heart rate, dehydration, and  
57 delirium tremens (Schuckit et al., 1995, Finn and Crabbe, 1997). The emotional symptoms of  
58 ethanol dependence, including anxiety-like behavior and depression-like behavior, can be  
59 modeled in animals during ethanol dependence (Pleil et al., 2015, Marcinkiewicz et al., 2015,  
60 Thorsell et al., 2007, Varlinskaya et al., 2017, Kallupi et al., 2014, Gilpin et al., 2012, Gilpin et  
61 al., 2015, Heilig et al., 2010, Kliethermes et al., 2004, Pandey et al., 2015, Pandey et al., 2003,  
62 Valdez et al., 2004, Valdez et al., 2002a, Ehlers et al., 2013, Vetreno et al., 2016, Rylkova et al.,  
63 2009, McClintick and Grant, 2016, Egli et al., 2012, Buck et al., 2014). An important challenge  
64 for preclinical researchers is the fact that these tests are usually not repeatable within subjects  
65 over time, which prevents conducting reliable longitudinal studies. Moreover, increased  
66 irritability is a key negative emotional symptom that has been largely neglected.

67 Irritability is one of the most common withdrawal symptoms in humans (Lubman et al.,  
68 1983) and has been anecdotally noted during withdrawal in animal models but shown to be  
69 difficult to quantify experimentally (Frye and Ellis, 1977, Riihioja et al., 1997, Riihioja et al.,  
70 1999, Woldbye et al., 2002, Becker, 2000). Thus, it is critical to characterize irritability-like  
71 behavior during withdrawal and protracted abstinence from ethanol in dependent rats.

72 A commonly used method to study ethanol dependence and withdrawal is the chronic  
73 intermittent ethanol (CIE) vapor exposure model (Kissler et al., 2014, Gilpin et al., 2008c, Gilpin

74 et al., 2008b, Staples et al., 2015, Leao et al., 2015, de Guglielmo et al., 2016, Kimbrough et al.,  
75 2017). Rats that are made dependent with CIE exhibit clinically-relevant blood ethanol levels  
76 (BELs; 150-250 mg%), an increase in ethanol drinking when tested during early and protracted  
77 withdrawal, and compulsive-like ethanol drinking (i.e., responding despite adverse  
78 consequences; (Rogers et al., 1979, Roberts et al., 1996, Roberts et al., 2000, O'Dell et al., 2004,  
79 Schulteis et al., 1995, Vendruscolo et al., 2012, Seif et al., 2013, Leao et al., 2015, Kimbrough et  
80 al., 2017). Ethanol dependence that is induced by ethanol vapor results in withdrawal symptoms  
81 during both acute withdrawal (somatic and motivational) and protracted abstinence  
82 (motivational; (Macey et al., 1996, Sommer et al., 2008, Schulteis et al., 1995, Williams et al.,  
83 2012, Kallupi et al., 2014, Valdez et al., 2002b, Zhao et al., 2007, Vendruscolo and Roberts,  
84 2014, de Guglielmo et al., 2017), but the effects of abstinence from CIE on irritability-like  
85 behavior during withdrawal and after protracted abstinence has not yet been reported.

86         Converging lines of evidence suggest that recruitment of the brain corticotropin-releasing  
87 factor (CRF)-CRF<sub>1</sub> receptor system during withdrawal from CIE is critical for the emergence of  
88 anxiety-like behavior (Valdez et al., 2002a, Sabino et al., 2006, Finn et al., 2007, Gilpin et al.,  
89 2008b, Richardson et al., 2008b, Richardson et al., 2008a), but the role of the CRF-CRF<sub>1</sub> system  
90 in irritability-like behavior during withdrawal remains to be demonstrated. In the present study,  
91 we hypothesized that (1) abstinence from ethanol after the escalation of ethanol drinking using  
92 the CIE model would increase irritability-like behavior in the bottle-brush test 8 h into  
93 withdrawal and after 2 weeks of protracted abstinence (Riittinen et al., 1986, Lagerspetz and  
94 Portin, 1968) and (2) the CRF<sub>1</sub> receptor antagonist R121919 would reduce irritability-like  
95 behavior during withdrawal.

96

97 **Materials and Methods**

98 *Animals*

99           Adult male Wistar rats (Charles River), weighing 250-300 g at the beginning of the  
100 experiments, were used. The rats were group housed, two per cage, in a temperature-controlled  
101 (22°C) vivarium on a 12 h/12 h light/dark cycle (lights on at 10:00 PM) with *ad libitum* access to  
102 food and water. All of the procedures were conducted in strict adherence to the National  
103 Institutes of Health *Guide for the Care and Use of Laboratory Animals* and approved by The  
104 Scripps Research Institute Institutional Animal Care and Use Committee.

105

106 *Operant ethanol self-administration*

107           Two cohorts of rats were used in this experiment. One cohort of rats ( $n = 24$ ) and an  
108 additional cohort of rats ( $n = 16$ ) were trained to self-administer ethanol. Both cohorts self-  
109 administered 10% (w/v) ethanol during daily sessions in standard operant conditioning chambers  
110 (Med Associates) until stable responding was maintained as previously described (de Guglielmo  
111 et al., 2016, Leao et al., 2015, Kimbrough et al., 2017). The rats were first subjected to an  
112 overnight session in the operant chambers with access to one lever (front lever) that delivered  
113 water on a fixed-ratio 1 (FR1) schedule (i.e., each operant response was reinforced with 0.1 ml of  
114 the solution). Food was available *ad libitum* during this training period. After 1 day off, the rats  
115 were subjected to a 3 h session (FR1) for 1 day, a 2 h session (FR1) the next day, and a 1 h  
116 session (FR1) the next day, with one lever delivering ethanol (front lever, 0.1 ml). All of the  
117 subsequent sessions lasted 30 min, and two levers were available (front lever: ethanol; back  
118 lever: water) until stable levels of intake were reached. Upon completion of this procedure, the  
119 animals were allowed to self-administer a 10% (w/v) ethanol solution and water on an FR1

120 schedule of reinforcement. The animals in the first cohort were then divided into two groups ( $n =$   
121 12 dependent,  $n = 12$  nondependent). The dependent group underwent the CIE protocol, and the  
122 nondependent group was left undisturbed in the vivarium. All of the rats in the second cohort  
123 underwent the CIE protocol to become ethanol-dependent.

124

#### 125 *Chronic intermittent ethanol vapor*

126 The rats in the dependent groups were made ethanol-dependent by the CIE vapor  
127 procedure as previously described (O'Dell et al., 2004, Gilpin et al., 2008a). The rats underwent  
128 repeated daily cycles of 14 h vapor ON (blood ethanol levels during vapor exposure ranged from  
129 150 to 250 mg%) and 10 h vapor OFF, during which behavioral testing occurred (i.e., 6-8 h after  
130 the vapor was turned OFF), when brain and BELs are negligible (Gilpin et al., 2009). After 4-6  
131 weeks of vapor exposure, the rats resumed operant self-administration sessions during  
132 withdrawal to test for the escalation of ethanol intake.

133

#### 134 *Blood ethanol measurements*

135 Tail blood was collected and used to determine blood ethanol levels (BELs) using an  
136 oxygen-rate ethanol analyzer (Analox Instruments, Stourbridge, UK).

137

#### 138 *Irritability-like behavior*

139 To test irritability-like behavior during ethanol withdrawal and protracted abstinence, we  
140 used the bottle-brush test, based on the methods of Riittinen et al. (1986) and Lagerspetz and  
141 Portin (1968) and modified slightly for rats. Irritability-like behavior was tested following the  
142 escalation of ethanol intake in the cohorts of dependent and nondependent rats and in age-

143 matched ethanol-naive rats ( $n = 10$ ). Testing occurred after 8 h of withdrawal or 2 weeks of  
144 protracted abstinence from CIE (in the dependent group). Irritability-like behavior was examined  
145 by measuring aggressive and defensive responses during the bottle-brush test.

146       Irritability-like behavior testing was performed in the middle half of the dark cycle under  
147 dark conditions with a red light for the observers. The sessions were conducted in a randomized  
148 order for each animal. Testing consisted of 10 trials per rat in plastic cages (10.5 in  $\times$  19 in  $\times$  8  
149 in; Ancare, Bellmore, NY, USA) with fresh bedding. During each trial, the rat started at the back  
150 of the cage. A bottle-brush was rotated toward the animal's whiskers (from the front of the cage)  
151 by a treatment-naive experimenter. The brush was rotated around the whiskers of the rat for  
152 approximately 1 s. The brush was then rotated back to the front of the cage where it was allowed  
153 to hang vertically for approximately 2 s, during which behavioral responses were recorded. A 10-  
154 s intertrial interval was used. Three observers who were blind to treatment scored the behaviors  
155 in real time.

156       For each rat, separate sums of aggressive and defensive responses across all trials were  
157 determined for each observer. Aggressive and defensive response scores for each rat were then  
158 calculated by averaging the observers' sums. This was then used to calculate a group mean and  
159 SEM.

160       The following were scored as aggressive responses: smelling the target, biting the target  
161 (during the initial phase of rotating the brush forward and back to the starting position), boxing  
162 the target, following the target, exploring the target (using paws or mouth to manipulate the  
163 brush without biting or boxing), mounting the target, and delayed biting (during the 2 s that the  
164 brush hung at the starting position). The following were scored as defensive responses: escaping  
165 from the target, digging, burying, jumping, climbing, vocalization, freezing, and grooming.



166 Grooming and digging were additionally recorded during the 10-s intertrial intervals.

167

168 *Effects of CRF antagonist on irritability-like behavior*

169 The second cohort of rats that was made dependent on ethanol via CIE exposure was  
170 tested for irritability-like behavior 8 h into withdrawal. Thirty minutes before testing, the rats  
171 were injected i.p. with either vehicle or the selective CRF<sub>1</sub> receptor antagonist R121919 (10  
172 mg/kg; synthesized by Dr. Kenner Rice at the Drug Design and Synthesis Section, Chemical  
173 Biology Research Branch, National Institute on Drug Abuse, National Institutes of Health,  
174 Bethesda, MD). Both vehicle and R121919 were administered in a solution that contained 5%  
175 dimethylsulfoxide, 5% Emulphor, and 90% distilled water. Following the injection of vehicle or  
176 R121919, the rats underwent the bottle-brush test as described above.

177

178 *Statistical analysis*

179 The results are expressed as mean  $\pm$  SEM. For the cohorts of dependent and  
180 nondependent rats, the last 3 days of ethanol intake before vapor exposure were averaged to  
181 obtain the pre-vapor baseline intake. The last 3 days of ethanol intake before bottle-brush testing  
182 were averaged to obtain the post-vapor (escalated) intake. The data were analyzed using  
183 repeated-measures analysis of variance (ANOVA), with group (nondependent and dependent) as  
184 the between-subjects factor and day (baseline intake and escalated intake) as the within-subjects  
185 factor. The data were also analyzed by week using repeated-measures ANOVA, with group  
186 (nondependent and dependent) as the between-subjects factor and week as the within-subjects  
187 factor. Behavioral data for the second cohort were analyzed using a one-way ANOVA to  
188 compare the average of the last 3 days of ethanol intake before vapor exposure (pre-vapor

189 baseline intake) and the average of the last 3 days of ethanol intake before bottle-brush testing  
190 (post-vapor escalated intake). For the bottle-brush test, each time point (8 h of withdrawal and 2  
191 weeks of protracted abstinence) was examined using a one-way ANOVA. The ANOVAs were  
192 followed by Fisher's Least Significant Difference (LSD) *post hoc* test when appropriate. To  
193 evaluate the effects of R121919 on behavior in the bottle-brush test, *t*-tests were performed  
194 between the two groups. Differences were considered significant at  $p < 0.05$ . All of the data were  
195 analyzed using Statistica 13 software (StatSoft, Palo Alto, USA).

196

## 197 **Results**

### 198 *Blood ethanol levels*

199 Blood ethanol levels were measured during CIE. In dependent rats, BELs were  
200 maintained between 150 and 250 mg/100 ml with no differences found between groups (data not  
201 shown).

202

### 203 *Operant ethanol self-administration during CIE exposure*

204 For operant ethanol self-administration, the mixed factorial ANOVA, with group  
205 (nondependent and dependent) as the between-subjects factor and day (baseline intake and  
206 escalated intake) as the within-subjects factor, revealed a significant day  $\times$  group interaction  
207 ( $F_{1,22} = 7.5$ ,  $p < 0.05$ ) and significant effects of day ( $F_{1,22} = 5.4$ ,  $p < 0.05$ ) and group ( $F_{1,22} = 4.1$ ,  
208  $p = 0.05$ ). Fisher's LSD *post hoc* test revealed that both dependent and nondependent rats  
209 reached a stable baseline of responding for ethanol during training ( $36.8 \pm 5.3$  lever presses in  
210 dependent rats vs.  $36.1 \pm 4.7$  lever presses in nondependent rats), with no significant difference  
211 between groups. After CIE exposure, dependent rats significantly escalated the number of lever

212 presses for ethanol compared with nondependent rats ( $61.9 \pm 7.7$  lever presses in dependent rats  
213 vs.  $34.0 \pm 6.3$  lever presses in nondependent rats;  $p < 0.05$ ; Fig 1A) and compared with their own  
214 baseline responding ( $61.9 \pm 7.7$  lever presses in dependent CIE rats vs.  $36.8 \pm 5.3$  lever presses in  
215 dependent baseline rats;  $p < 0.05$ ; Fig. 1A).

216 When we analyzed the data according to weeks of ethanol self administration, the  
217 repeated-measures ANOVA, with group (nondependent and dependent) as the between-subjects  
218 factor and week as the within-subjects factor, revealed a significant week  $\times$  group interaction  
219 ( $F_{4,88} = 3.9$ ,  $p < 0.05$ ) and a significant effect of week ( $F_{4,88} = 4.8$ ,  $p < 0.005$ ) but no effect of  
220 group ( $F_{1,22} = 3.6$ ,  $p = 0.07$ ). Fisher's LSD *post hoc* test revealed that dependent rats presented a  
221 significant increase in ethanol intake relative to their own baseline at weeks 2-4 of CIE exposure.  
222 Dependent rats also exhibited a significant increase in ethanol intake compared with  
223 nondependent rats at weeks 3 and 4 (Fig. 1B).

224

#### 225 *Irritability-like behavior at 8 h withdrawal and 2 weeks abstinence from CIE*

226 When tested 8 h into withdrawal from ethanol vapor, there was a significant effect of  
227 group on aggressive responses ( $F_{2,31} = 11.8$ ,  $p < 0.0005$ ). Fisher's LSD *post hoc* test showed that  
228 ethanol-dependent rats had a significantly higher number of aggressive responses ( $26.3 \pm 2.8$ )  
229 compared with both nondependent rats ( $14.4 \pm 2.6$ ) and naive rats ( $9.6 \pm 1.6$ ; Fig. 2A). No  
230 significant difference in defensive responses was found between groups (Fig. 2B).

231 When tested 2 weeks into protracted abstinence from ethanol vapor, there was a  
232 significant effect of group on aggressive responses ( $F_{2,31} = 6.7$ ,  $p < 0.005$ ). Fisher's LSD *post*  
233 *hoc* test showed that ethanol-dependent rats had a significantly higher number of aggressive  
234 responses ( $27.2 \pm 2.7$ ) compared with both nondependent rats ( $18 \pm 2.0$ ) and naive rats ( $14.8 \pm$

235 2.7; Fig. 3A). No significant difference in defensive responses was found between groups (Fig.  
236 3B).

237

### 238 *Effects of CRF antagonist on irritability-like behavior*

239 Operant ethanol self-administration for the vehicle (baseline:  $14.8 \pm 4.2$  lever presses;  
240 escalated:  $46.8 \pm 8.3$  lever presses) and R121919 (baseline:  $15.8 \pm 4.5$  lever presses; escalated:  
241  $47.5 \pm 7.5$  lever presses) groups did not differ at either baseline or during escalation. The data  
242 from both groups were combined, and further analyses were performed to compare baseline *vs.*  
243 escalated intake in all dependent rats using a one-way repeated-measures ANOVA, with day  
244 (baseline intake and escalated intake) as the within-subjects factor. There was a significant effect  
245 of day on responding for ethanol ( $F_{1,15} = 22.1, p < 0.0005$ ). Fisher's LSD *post hoc* test revealed  
246 that ethanol-dependent rats presented significantly higher ethanol intake during escalation  
247 compared with their own baseline ( $15.3 \pm 3.0$  lever presses at baseline *vs.*  $47.1 \pm 5.4$  lever  
248 presses during escalation; Fig. 4A).

249 When ethanol-dependent rats were tested for irritability-like behavior in the bottle-brush  
250 test during acute withdrawal (after injection of vehicle or R121919), there was a significant  
251 effect of group (vehicle *vs.* 10 mg/kg R121919;  $t_{14} = 2.2, p < 0.05$ ). R121919 significantly  
252 decreased aggressive responses ( $8.3 \pm 2.7$ ) compared with vehicle-treated rats ( $18.2 \pm 3.5$ ; Fig.  
253 4B). No significant difference in defensive responses was found between groups (Fig. 4C).

254

## 255 **Discussion**

256 The present study found that rats that were made dependent on ethanol via CIE exhibited  
257 an increase in irritability-like behavior in the bottle-brush test 8 h into withdrawal and 2 weeks

258 into protracted abstinence. The specific CRF<sub>1</sub> receptor antagonist R121919, at a dose that is  
259 known to block central CRF<sub>1</sub> receptors, decreased the withdrawal-induced increase in irritability-  
260 like behavior.

261         Similar to other studies (Gilpin et al., 2008c, Gilpin et al., 2008b, Leao et al., 2015,  
262 Williams et al., 2012, O'Dell et al., 2004, Walker et al., 2008), rats that were made dependent on  
263 ethanol via CIE significantly escalated their ethanol intake. Interestingly, we found that ethanol-  
264 dependent rats exhibited an increase in irritability-like behavior in the bottle-brush test 8 h into  
265 withdrawal and 2 weeks into protracted abstinence from ethanol vapor compared with both  
266 nondependent and naive rats. R121919 blocked the increase in irritability-like behavior 8 h into  
267 withdrawal in dependent rats. This effect was observed only for aggressive responses and not for  
268 defensive responses, indicating a behaviorally-specific effect.

269         Aggressive irritability-like behavior has not been previously tested to measure negative  
270 emotional states during ethanol withdrawal in the rat CIE model. Animal models of irritability  
271 have been difficult to characterize, and reports are often limited to anecdotes or have used less  
272 specific or quantitative assessments, such as reactivity to handling (Frye and Ellis, 1977, Riihioja  
273 et al., 1997, Riihioja et al., 1999, Woldbye et al., 2002, Becker, 2000). An increase in irritability-  
274 like behavior 8 h into withdrawal from ethanol is consistent with results for other withdrawal  
275 symptoms.

276         Somatic withdrawal symptoms have been well characterized during withdrawal from  
277 ethanol vapor. Somatic withdrawal symptoms, such as tremors, abnormal gait, and tail stiffness,  
278 are often observed during acute withdrawal from ethanol vapor. These changes can be seen as  
279 early as 2 h into withdrawal and last up to 72 h (Macey et al., 1996, de Guglielmo et al., 2016, de  
280 Guglielmo et al., 2015). The motivational symptoms of withdrawal have been found to last much

281 longer (> 2 weeks) into protracted abstinence. Increases in anxiety-like behavior in the elevated  
282 plus maze and depressive-like behavior (e.g., immobility) in the forced swim test have been  
283 reported in ethanol-dependent rats and mice during acute withdrawal from ethanol vapor and  
284 after protracted abstinence (Kallupi et al., 2014, Valdez et al., 2002b, Zhao et al., 2007, Williams  
285 et al., 2012, Marcinkiewicz et al., 2015, Shibasaki et al., 2012, Walker et al., 2010). Impairments  
286 in brain reward function, reflected by elevations of intracranial self-stimulation (ICSS)  
287 thresholds, have also been observed during acute withdrawal from ethanol vapor in dependent  
288 rats (Schulteis et al., 1995). Perhaps the closest measures of irritability that have been reported  
289 during withdrawal include 22 kHz ultrasonic vocalizations and measures of reactivity to touch or  
290 handling (including vocalizations; (Frye and Ellis, 1977, Riihioja et al., 1997, Riihioja et al.,  
291 1999, Woldbye et al., 2002, Becker, 2000, Akunne and Soliman, 1988). Ultrasonic vocalizations  
292 are thought to represent distress in animals (Becker, 2000) and greatly increase during  
293 withdrawal from ethanol vapor and an ethanol liquid diet (Williams et al., 2012, Knapp et al.,  
294 1998, Buck et al., 2014). Neither of these measures, however, recapitulates the specific increase  
295 in aggressive responses that were observed in the present study, which might more specifically  
296 model the quick-to-anger, grouchiness, and hostility that is seen during ethanol withdrawal in  
297 humans.

298         In the present study, we observed an increase in irritability-like behavior after 2 weeks of  
299 protracted abstinence, which is consistent with motivational measures of ethanol withdrawal that  
300 have been shown to persist into protracted abstinence (2-8 weeks) from ethanol vapor (Roberts et  
301 al., 2000). Rats that underwent 4-6 weeks of abstinence from ethanol exhibited an increase in  
302 anxiety-like behavior and a decrease in the time spent on the open arms in the elevated plus maze  
303 (Valdez et al., 2002b, Zhao et al., 2007). However, an important advantage of using the bottle-

304 brush test over the elevated plus maze test is that the former can be repeated in the same  
305 individuals. Our results revealed a consistent increase in irritability-like behavior during both  
306 acute and protracted abstinence in the same subjects.

307 Altogether, the present results suggest that irritability-like behavior may be a clinically  
308 relevant measure of a negative emotional state that may model the anxiety, irritability, and mood  
309 disturbances that can persist long after detoxification in ethanol-dependent humans (Brady et al.,  
310 2002, Martinotti et al., 2007, Miyata et al., 2008, Haney, 2005). Irritable aggression may be a  
311 prognostically relevant motivational withdrawal symptom that predicts an increase in craving  
312 (Chiang et al., 2002) and more relapse episodes in ethanol-dependent males during abstinence  
313 (Baars et al., 2013).

314 CRF-CRF<sub>1</sub> receptor signaling has been shown to be critically involved in ethanol  
315 withdrawal-related behaviors (Zorrilla et al., 2013). CRF blockade with various receptor  
316 antagonists has been shown to reduce ethanol intake in dependent rats (Heilig and Koob, 2007,  
317 Funk et al., 2007, Valdez et al., 2002b, Funk et al., 2006) and anxiety-like behavior in dependent  
318 rats (Heilig and Koob, 2007, Baldwin et al., 1991, Rassnick et al., 1993, Valdez et al., 2003).  
319 Irritability-like behavior also appears to be inhibited by CRF<sub>1</sub> receptor blockade, suggesting that  
320 irritability- and anxiety-like behavior may share common neurocircuitry. Combining the bottle-  
321 brush test with other reliable tests may help identify unique *vs.* overlapping neural substrates and  
322 the pathophysiological relevance of different motivational symptoms of withdrawal.

323 In summary, the present study found increases in irritable aggression-like behavior in  
324 ethanol-dependent rats during acute withdrawal and protracted abstinence. CRF<sub>1</sub> antagonism  
325 specifically blocked the increase in irritability-like behavior in ethanol-dependent rats. The  
326 bottle-brush test may represent a clinically relevant, reliable, and reproducible method to

327 investigate the neurobiological mechanisms that underlie the emergence of negative emotional  
328 states during abstinence and may facilitate drug discovery by providing a high-throughput  
329 within-subjects paradigm for the preclinical screening of novel medications for the treatment of  
330 symptoms of alcohol use disorders.

331

## 332 **References**

333 AKUNNE, H. C. & SOLIMAN, K. F. 1988. Hyperglycemic suppression of morphine withdrawal  
334 signs in the rat. *Psychopharmacology (Berl)*, 96, 1-6.

335

336 BAARS, M. Y., MULLER, M. J., GALLHOFER, B. & NETTER, P. 2013. Relapse (number of  
337 detoxifications) in abstinent male alcohol-dependent patients as related to  
338 personality traits and types of tolerance to frustration. *Neuropsychobiology*, 67, 241-  
339 8.

340

341 BALDWIN, H. A., RASSNICK, S., RIVIER, J., KOOB, G. F. & BRITTON, K. T. 1991. CRF  
342 antagonist reverses the "anxiogenic" response to ethanol withdrawal in the rat.  
343 *Psychopharmacology (Berl)*, 103, 227-32.

344

345 BECKER, H. C. 2000. Animal models of alcohol withdrawal. *Alcohol Res Health*, 24, 105-13.

346

347 BRADY, K. T., MYRICK, H., HENDERSON, S. & COFFEY, S. F. 2002. The use of divalproex in  
348 alcohol relapse prevention: a pilot study. *Drug Alcohol Depend*, 67, 323-30.

349

350 BUCK, C. L., MALAVAR, J. C., GEORGE, O., KOOB, G. F. & VENDRUSCOLO, L. F. 2014.  
351 Anticipatory 50 kHz ultrasonic vocalizations are associated with escalated alcohol  
352 intake in dependent rats. *Behav Brain Res*, 271, 171-6.

353

354 CHIANG, S. S., SCHUETZ, C. G. & SOYKA, M. 2002. Effects of irritability on craving before and  
355 after cue exposure in abstinent alcoholic inpatients: experimental data on subjective  
356 response and heart rate. *Neuropsychobiology*, 46, 150-60.

357

358 DE GUGLIELMO, G., CRAWFORD, E., KIM, S., VENDRUSCOLO, L. F., HOPE, B. T., BRENNAN,  
359 M., COLE, M., KOOB, G. F. & GEORGE, O. 2016. Recruitment of a Neuronal Ensemble  
360 in the Central Nucleus of the Amygdala Is Required for Alcohol Dependence. *J*  
361 *Neurosci*, 36, 9446-53.

362

363 DE GUGLIELMO, G., KALLUPI, M., COLE, M. D. & GEORGE, O. 2017. Voluntary induction and  
364 maintenance of alcohol dependence in rats using alcohol vapor self-administration.  
365 *Psychopharmacology (Berl)*, 234, 2009-2018.

366



- 367 DE GUGLIELMO, G., MARTIN-FARDON, R., TESHIMA, K., CICCOCIOPPO, R. & WEISS, F. 2015.  
368 MT-7716, a potent NOP receptor agonist, preferentially reduces ethanol seeking and  
369 reinforcement in post-dependent rats. *Addict Biol*, 20, 643-51.  
370
- 371 EGLI, M., KOOB, G. F. & EDWARDS, S. 2012. Alcohol dependence as a chronic pain disorder.  
372 *Neurosci Biobehav Rev*, 36, 2179-92.  
373
- 374 EHLERS, C. L., LIU, W., WILLS, D. N. & CREWS, F. T. 2013. Periadolescent ethanol vapor  
375 exposure persistently reduces measures of hippocampal neurogenesis that are  
376 associated with behavioral outcomes in adulthood. *Neuroscience*, 244, 1-15.  
377
- 378 FINN, D. A. & CRABBE, J. C. 1997. Exploring alcohol withdrawal syndrome. *Alcohol Health*  
379 *Res World*, 21, 149-56.  
380
- 381 FINN, D. A., SNELLING, C., FRETWELL, A. M., TANCHUCK, M. A., UNDERWOOD, L., COLE, M.,  
382 CRABBE, J. C. & ROBERTS, A. J. 2007. Increased drinking during withdrawal from  
383 intermittent ethanol exposure is blocked by the CRF receptor antagonist D-Phe-  
384 CRF(12-41). *Alcohol Clin Exp Res*, 31, 939-49.  
385
- 386 FRYE, G. D. & ELLIS, F. W. 1977. Effects of 6-hydroxydopamine or 5,7-dihydroxy-tryptamine  
387 on the development of physical dependence on ethanol. *Drug Alcohol Depend*, 2,  
388 349-59.  
389
- 390 FUNK, C. K., O'DELL, L. E., CRAWFORD, E. F. & KOOB, G. F. 2006. Corticotropin-releasing  
391 factor within the central nucleus of the amygdala mediates enhanced ethanol self-  
392 administration in withdrawn, ethanol-dependent rats. *J Neurosci*, 26, 11324-32.  
393
- 394 FUNK, C. K., ZORRILLA, E. P., LEE, M. J., RICE, K. C. & KOOB, G. F. 2007. Corticotropin-  
395 releasing factor 1 antagonists selectively reduce ethanol self-administration in  
396 ethanol-dependent rats. *Biol Psychiatry*, 61, 78-86.  
397
- 398 GILPIN, N. W., HERMAN, M. A. & ROBERTO, M. 2015. The central amygdala as an integrative  
399 hub for anxiety and alcohol use disorders. *Biol Psychiatry*, 77, 859-69.  
400
- 401 GILPIN, N. W., KARANIKAS, C. A. & RICHARDSON, H. N. 2012. Adolescent binge drinking  
402 leads to changes in alcohol drinking, anxiety, and amygdalar corticotropin releasing  
403 factor cells in adulthood in male rats. *PLoS One*, 7, e31466.  
404
- 405 GILPIN, N. W., MISRA, K. & KOOB, G. F. 2008a. Neuropeptide Y in the central nucleus of the  
406 amygdala suppresses dependence-induced increases in alcohol drinking. *Pharmacol*  
407 *Biochem Behav*, 90, 475-80.  
408
- 409 GILPIN, N. W., RICHARDSON, H. N. & KOOB, G. F. 2008b. Effects of CRF1-receptor and  
410 opioid-receptor antagonists on dependence-induced increases in alcohol drinking  
411 by alcohol-preferring (P) rats. *Alcohol Clin Exp Res*, 32, 1535-42.  
412

- 413 GILPIN, N. W., RICHARDSON, H. N., LUMENG, L. & KOOB, G. F. 2008c. Dependence-induced  
414 alcohol drinking by alcohol-preferring (P) rats and outbred Wistar rats. *Alcohol Clin*  
415 *Exp Res*, 32, 1688-96.  
416
- 417 GILPIN, N. W., SMITH, A. D., COLE, M., WEISS, F., KOOB, G. F. & RICHARDSON, H. N. 2009.  
418 Operant behavior and alcohol levels in blood and brain of alcohol-dependent rats.  
419 *Alcohol Clin Exp Res*, 33, 2113-23.  
420
- 421 HANEY, M. 2005. The marijuana withdrawal syndrome: diagnosis and treatment. *Curr*  
422 *Psychiatry Rep*, 7, 360-6.  
423
- 424 HEILIG, M., EGLI, M., CRABBE, J. C. & BECKER, H. C. 2010. Acute withdrawal, protracted  
425 abstinence and negative affect in alcoholism: are they linked? *Addict Biol*, 15, 169-  
426 84.  
427
- 428 HEILIG, M. & KOOB, G. F. 2007. A key role for corticotropin-releasing factor in alcohol  
429 dependence. *Trends Neurosci*, 30, 399-406.  
430
- 431 KALLUPI, M., VENDRUSCOLO, L. F., CARMICHAEL, C. Y., GEORGE, O., KOOB, G. F. & GILPIN,  
432 N. W. 2014. Neuropeptide YY(2)R blockade in the central amygdala reduces anxiety-  
433 like behavior but not alcohol drinking in alcohol-dependent rats. *Addict Biol*, 19,  
434 755-7.  
435
- 436 KIMBROUGH, A., KIM, S., COLE, M., BRENNAN, M. & GEORGE, O. 2017. Intermittent Access  
437 to Ethanol Drinking Facilitates the Transition to Excessive Drinking After Chronic  
438 Intermittent Ethanol Vapor Exposure. *Alcoholism: Clinical and Experimental*  
439 *Research*, In Press.  
440
- 441 KISSLER, J. L., SIROHI, S., REIS, D. J., JANSEN, H. T., QUOCK, R. M., SMITH, D. G. & WALKER, B.  
442 M. 2014. The one-two punch of alcoholism: role of central amygdala  
443 dynorphins/kappa-opioid receptors. *Biol Psychiatry*, 75, 774-82.  
444
- 445 KLIETHERMES, C. L., CRONISE, K. & CRABBE, J. C. 2004. Anxiety-like behavior in mice in  
446 two apparatuses during withdrawal from chronic ethanol vapor inhalation. *Alcohol*  
447 *Clin Exp Res*, 28, 1012-9.  
448
- 449 KNAPP, D. J., DUNCAN, G. E., CREWS, F. T. & BREESE, G. R. 1998. Induction of Fos-like  
450 proteins and ultrasonic vocalizations during ethanol withdrawal: further evidence  
451 for withdrawal-induced anxiety. *Alcohol Clin Exp Res*, 22, 481-93.  
452
- 453 KOOB, G. F., AHMED, S. H., BOUTREL, B., CHEN, S. A., KENNY, P. J., MARKOU, A., O'DELL, L. E.,  
454 PARSONS, L. H. & SANNA, P. P. 2004. Neurobiological mechanisms in the transition  
455 from drug use to drug dependence. *Neurosci Biobehav Rev*, 27, 739-49.  
456
- 457 KOOB, G. F. & VOLKOW, N. D. 2010. Neurocircuitry of addiction. *Neuropsychopharmacology*,  
458 35, 217-38.

- 459  
460 LAGERSPETZ, K. & PORTIN, R. 1968. Simulation of cues eliciting aggressive responses in  
461 mice at two age levels. *J Genet Psychol*, 113, 53-63.  
462
- 463 LEAO, R. M., CRUZ, F. C., VENDRUSCOLO, L. F., DE GUGLIELMO, G., LOGRIP, M. L., PLANETA,  
464 C. S., HOPE, B. T., KOOB, G. F. & GEORGE, O. 2015. Chronic nicotine activates  
465 stress/reward-related brain regions and facilitates the transition to compulsive  
466 alcohol drinking. *J Neurosci*, 35, 6241-53.  
467
- 468 LUBMAN, A., EMRICK, C., MOSIMANN, W. F. & FREEDMAN, R. 1983. Altered mood and  
469 norepinephrine metabolism following withdrawal from alcohol. *Drug Alcohol*  
470 *Depend*, 12, 3-13.  
471
- 472 MACEY, D. J., SCHULTEIS, G., HEINRICHS, S. C. & KOOB, G. F. 1996. Time-dependent  
473 quantifiable withdrawal from ethanol in the rat: effect of method of dependence  
474 induction. *Alcohol*, 13, 163-70.  
475
- 476 MARCINKIEWCZ, C. A., DORRIER, C. E., LOPEZ, A. J. & KASH, T. L. 2015. Ethanol induced  
477 adaptations in 5-HT<sub>2c</sub> receptor signaling in the bed nucleus of the stria terminalis:  
478 implications for anxiety during ethanol withdrawal. *Neuropharmacology*, 89, 157-  
479 67.  
480
- 481 MARTINOTTI, G., DI NICOLA, M., ROMANELLI, R., ANDREOLI, S., POZZI, G., MORONI, N. &  
482 JANIRI, L. 2007. High and low dosage oxcarbazepine versus naltrexone for the  
483 prevention of relapse in alcohol-dependent patients. *Hum Psychopharmacol*, 22,  
484 149-56.  
485
- 486 MCCLINTICK, M. N. & GRANT, K. A. 2016. Aggressive temperament predicts ethanol self-  
487 administration in late adolescent male and female rhesus macaques.  
488 *Psychopharmacology (Berl)*, 233, 3965-3976.  
489
- 490 MIYATA, H., HIRONAKA, N., TAKADA, K., MIYASATO, K., NAKAMURA, K. & YANAGITA, T.  
491 2008. Psychosocial withdrawal characteristics of nicotine compared with alcohol  
492 and caffeine. *Ann N Y Acad Sci*, 1139, 458-65.  
493
- 494 O'DELL, L. E., ROBERTS, A. J., SMITH, R. T. & KOOB, G. F. 2004. Enhanced alcohol self-  
495 administration after intermittent versus continuous alcohol vapor exposure. *Alcohol*  
496 *Clin Exp Res*, 28, 1676-82.  
497
- 498 PANDEY, S. C., ROY, A. & ZHANG, H. 2003. The decreased phosphorylation of cyclic  
499 adenosine monophosphate (cAMP) response element binding (CREB) protein in the  
500 central amygdala acts as a molecular substrate for anxiety related to ethanol  
501 withdrawal in rats. *Alcohol Clin Exp Res*, 27, 396-409.  
502  
503

- 504 PANDEY, S. C., SAKHARKAR, A. J., TANG, L. & ZHANG, H. 2015. Potential role of adolescent  
505 alcohol exposure-induced amygdaloid histone modifications in anxiety and alcohol  
506 intake during adulthood. *Neurobiol Dis*, 82, 607-19.  
507
- 508 PLEIL, K. E., LOWERY-GIONTA, E. G., CROWLEY, N. A., LI, C., MARCINKIEWCZ, C. A., ROSE, J.  
509 H., MCCALL, N. M., MALDONADO-DEVINCCI, A. M., MORROW, A. L., JONES, S. R. &  
510 KASH, T. L. 2015. Effects of chronic ethanol exposure on neuronal function in the  
511 prefrontal cortex and extended amygdala. *Neuropharmacology*, 99, 735-49.  
512
- 513 RASSNICK, S., HEINRICHS, S. C., BRITTON, K. T. & KOOB, G. F. 1993. Microinjection of a  
514 corticotropin-releasing factor antagonist into the central nucleus of the amygdala  
515 reverses anxiogenic-like effects of ethanol withdrawal. *Brain Res*, 605, 25-32.  
516
- 517 RICHARDSON, H. N., LEE, S. Y., O'DELL, L. E., KOOB, G. F. & RIVIER, C. L. 2008a. Alcohol self-  
518 administration acutely stimulates the hypothalamic-pituitary-adrenal axis, but  
519 alcohol dependence leads to a dampened neuroendocrine state. *Eur J Neurosci*, 28,  
520 1641-53.  
521
- 522 RICHARDSON, H. N., ZHAO, Y., FEKETE, E. M., FUNK, C. K., WIRSCHING, P., JANDA, K. D.,  
523 ZORRILLA, E. P. & KOOB, G. F. 2008b. MPZP: a novel small molecule corticotropin-  
524 releasing factor type 1 receptor (CRF1) antagonist. *Pharmacol Biochem Behav*, 88,  
525 497-510.  
526
- 527 RIIHIOJA, P., JAATINEN, P., HAAPALINNA, A., KIIANMAA, K. & HERVONEN, A. 1999. Effects  
528 of dexmedetomidine on rat locus coeruleus and ethanol withdrawal symptoms  
529 during intermittent ethanol exposure. *Alcohol Clin Exp Res*, 23, 432-8.  
530
- 531 RIIHIOJA, P., JAATINEN, P., OKSANEN, H., HAAPALINNA, A., HEINONEN, E. & HERVONEN, A.  
532 1997. Dexmedetomidine, diazepam, and propranolol in the treatment of ethanol  
533 withdrawal symptoms in the rat. *Alcohol Clin Exp Res*, 21, 804-8.  
534
- 535 RIITTINEN, M. L., LINDROOS, F., KIMANEN, A., PIENINKEROINEN, E., PIENINKEROINEN, I.,  
536 SIPPOLA, J., VEILAHTI, J., BERGSTROM, M. & JOHANSSON, G. 1986. Impoverished  
537 rearing conditions increase stress-induced irritability in mice. *Dev Psychobiol*, 19,  
538 105-11.  
539
- 540 ROBERTS, A. J., COLE, M. & KOOB, G. F. 1996. Intra-amygdala muscimol decreases operant  
541 ethanol self-administration in dependent rats. *Alcohol Clin Exp Res*, 20, 1289-98.  
542
- 543 ROBERTS, A. J., HEYSER, C. J., COLE, M., GRIFFIN, P. & KOOB, G. F. 2000. Excessive ethanol  
544 drinking following a history of dependence: animal model of allostasis.  
545 *Neuropsychopharmacology*, 22, 581-94.  
546
- 547 ROGERS, J., WIENER, S. G. & BLOOM, F. E. 1979. Long-term ethanol administration methods  
548 for rats: advantages of inhalation over intubation or liquid diets. *Behav Neural Biol*,  
549 27, 466-86.

- 550  
551 RYLKOVA, D., SHAH, H. P., SMALL, E. & BRUIJNZEEL, A. W. 2009. Deficit in brain reward  
552 function and acute and protracted anxiety-like behavior after discontinuation of a  
553 chronic alcohol liquid diet in rats. *Psychopharmacology (Berl)*, 203, 629-40.  
554
- 555 SABINO, V., COTTONE, P., KOOB, G. F., STEARDO, L., LEE, M. J., RICE, K. C. & ZORRILLA, E. P.  
556 2006. Dissociation between opioid and CRF1 antagonist sensitive drinking in  
557 Sardinian alcohol-preferring rats. *Psychopharmacology (Berl)*, 189, 175-86.  
558
- 559 SCHUCKIT, M. A., TIPP, J. E., REICH, T., HESSELBROCK, V. M. & BUCHOLZ, K. K. 1995. The  
560 histories of withdrawal convulsions and delirium tremens in 1648 alcohol  
561 dependent subjects. *Addiction*, 90, 1335-47.  
562
- 563 SCHULTEIS, G., MARKOU, A., COLE, M. & KOOB, G. F. 1995. Decreased brain reward  
564 produced by ethanol withdrawal. *Proc Natl Acad Sci U S A*, 92, 5880-4.  
565
- 566 SEIF, T., CHANG, S. J., SIMMS, J. A., GIBB, S. L., DADGAR, J., CHEN, B. T., HARVEY, B. K., RON,  
567 D., MESSING, R. O., BONCI, A. & HOPF, F. W. 2013. Cortical activation of accumbens  
568 hyperpolarization-active NMDARs mediates aversion-resistant alcohol intake. *Nat*  
569 *Neurosci*, 16, 1094-100.  
570
- 571 SHIBASAKI, M., KUROKAWA, K., MIZUNO, K. & OHKUMA, S. 2012. Effect of aripiprazole on  
572 anxiety associated with ethanol physical dependence and on ethanol-induced place  
573 preference. *J Pharmacol Sci*, 118, 215-24.  
574
- 575 SOMMER, W. H., RIMONDINI, R., HANSSON, A. C., HIPSKIND, P. A., GEHLERT, D. R., BARR, C.  
576 S. & HEILIG, M. A. 2008. Upregulation of voluntary alcohol intake, behavioral  
577 sensitivity to stress, and amygdala crhr1 expression following a history of  
578 dependence. *Biol Psychiatry*, 63, 139-45.  
579
- 580 STAPLES, M. C., KIM, A. & MANDYAM, C. D. 2015. Dendritic remodeling of hippocampal  
581 neurons is associated with altered NMDA receptor expression in alcohol dependent  
582 rats. *Mol Cell Neurosci*, 65, 153-62.  
583
- 584 THORSELL, A., JOHNSON, J. & HEILIG, M. 2007. Effect of the adenosine A2a receptor  
585 antagonist 3,7-dimethyl-propargylxanthine on anxiety-like and depression-like  
586 behavior and alcohol consumption in Wistar Rats. *Alcohol Clin Exp Res*, 31, 1302-7.  
587
- 588 VALDEZ, G. R., ROBERTS, A. J., CHAN, K., DAVIS, H., BRENNAN, M., ZORRILLA, E. P. & KOOB,  
589 G. F. 2002a. Increased ethanol self-administration and anxiety-like behavior during  
590 acute ethanol withdrawal and protracted abstinence: regulation by corticotropin-  
591 releasing factor. *Alcohol Clin Exp Res*, 26, 1494-501.  
592
- 593 VALDEZ, G. R., ROBERTS, A. J., CHAN, K., DAVIS, H., BRENNAN, M., ZORRILLA, E. P. & KOOB,  
594 G. F. 2002b. Increased ethanol self-administration and anxiety-like behavior during

- 595 acute ethanol withdrawal and protracted abstinence: regulation by corticotropin-  
596 releasing factor. *Alcohol Clin Exp Res*, 26, 1494-501.  
597
- 598 VALDEZ, G. R., SABINO, V. & KOOB, G. F. 2004. Increased anxiety-like behavior and ethanol  
599 self-administration in dependent rats: reversal via corticotropin-releasing factor-2  
600 receptor activation. *Alcohol Clin Exp Res*, 28, 865-72.  
601
- 602 VALDEZ, G. R., ZORRILLA, E. P., ROBERTS, A. J. & KOOB, G. F. 2003. Antagonism of  
603 corticotropin-releasing factor attenuates the enhanced responsiveness to stress  
604 observed during protracted ethanol abstinence. *Alcohol*, 29, 55-60.  
605
- 606 VARLINSKAYA, E. I., KIM, E. U. & SPEAR, L. P. 2017. Chronic intermittent ethanol exposure  
607 during adolescence: Effects on stress-induced social alterations and social drinking  
608 in adulthood. *Brain Res*, 1654, 145-156.  
609
- 610 VENDRUSCOLO, L. F., BARBIER, E., SCHLOSBERG, J. E., MISRA, K. K., WHITFIELD, T. W., JR.,  
611 LOGRIP, M. L., RIVIER, C., REPUNTE-CANONIGO, V., ZORRILLA, E. P., SANNA, P. P.,  
612 HEILIG, M. & KOOB, G. F. 2012. Corticosteroid-dependent plasticity mediates  
613 compulsive alcohol drinking in rats. *J Neurosci*, 32, 7563-71.  
614
- 615 VENDRUSCOLO, L. F. & ROBERTS, A. J. 2014. Operant alcohol self-administration in  
616 dependent rats: focus on the vapor model. *Alcohol*, 48, 277-86.  
617
- 618 VETRENO, R. P., YAXLEY, R., PANIAGUA, B. & CREWS, F. T. 2016. Diffusion tensor imaging  
619 reveals adolescent binge ethanol-induced brain structural integrity alterations in  
620 adult rats that correlate with behavioral dysfunction. *Addict Biol*, 21, 939-53.  
621
- 622 WALKER, B. M., DRIMMER, D. A., WALKER, J. L., LIU, T., MATHE, A. A. & EHLERS, C. L. 2010.  
623 Effects of prolonged ethanol vapor exposure on forced swim behavior, and  
624 neuropeptide Y and corticotropin-releasing factor levels in rat brains. *Alcohol*, 44,  
625 487-93.  
626
- 627 WALKER, B. M., RASMUSSEN, D. D., RASKIND, M. A. & KOOB, G. F. 2008. alpha1-  
628 noradrenergic receptor antagonism blocks dependence-induced increases in  
629 responding for ethanol. *Alcohol*, 42, 91-7.  
630
- 631 WILLIAMS, A. M., REIS, D. J., POWELL, A. S., NEIRA, L. J., NEALEY, K. A., ZIEGLER, C. E.,  
632 KLOSS, N. D., BILIMORIA, J. L., SMITH, C. E. & WALKER, B. M. 2012. The effect of  
633 intermittent alcohol vapor or pulsatile heroin on somatic and negative affective  
634 indices during spontaneous withdrawal in Wistar rats. *Psychopharmacology (Berl)*,  
635 223, 75-88.  
636
- 637 WOLDBYE, D. P., ULRICHSEN, J., HAUGBOL, S. & BOLWIG, T. G. 2002. Ethanol withdrawal in  
638 rats is attenuated by intracerebroventricular administration of neuropeptide Y.  
639 *Alcohol Alcohol*, 37, 318-21.  
640

641 ZHAO, Y., WEISS, F. & ZORRILLA, E. P. 2007. Remission and resurgence of anxiety-like  
642 behavior across protracted withdrawal stages in ethanol-dependent rats. *Alcohol*  
643 *Clin Exp Res*, 31, 1505-15.

644  
645 ZORRILLA, E. P., HEILIG, M., DE WIT, H. & SHAHAM, Y. 2013. Behavioral, biological, and  
646 chemical perspectives on targeting CRF(1) receptor antagonists to treat alcoholism.  
647 *Drug Alcohol Depend*, 128, 175-86.  
648

#### 649 **Acknowledgements**

650 The authors acknowledge expert technical assistance by Maury Cole and editorial  
651 assistance by Michael Arends.

652

653 **Figure Legends**

654

655 **Figure 1.** Escalation of operant ethanol self-administration after CIE. Rats were trained to  
656 operantly self-administer ethanol until they reached a stable baseline. Dependent rats were made  
657 dependent via chronic intermittent ethanol vapor. Dependent and nondependent rats were then  
658 tested daily for the escalation of operant ethanol self-administration. **(A)** Average of the last 3  
659 days of pre-vapor (baseline) and post-vapor (escalation) prior to testing irritability-like behavior.  
660 Dependent rats significantly escalated their ethanol intake relative to baseline (white bar) after  
661 CIE (post vapor; black bar). Dependent rats also exhibited significantly higher ethanol intake  
662 after CIE compared with nondependent rats (post vapor; black bar). Nondependent rats did not  
663 significantly escalate their ethanol intake relative to baseline (white bar). **(B)** Average ethanol  
664 intake per operant session during each week of CIE exposure. Dependent rats (black circles)  
665 significantly escalated their ethanol intake relative to their own baseline at weeks 2-4. Dependent  
666 rats significantly escalated their ethanol intake compared with nondependent rats (white circles)  
667 at weeks 3 and 4. \* $p < 0.05$ , dependent post-vapor each week *vs.* dependent baseline intake; # $p <$   
668 0.05, dependent post-vapor each week *vs.* nondependent post-vapor each week.

669

670 **Figure 2.** Irritability-like behavior in ethanol-dependent rats 8 h into withdrawal from ethanol  
671 vapor. Rats underwent the bottle-brush test to assess aggressive and defensive responses. **(A)**  
672 Aggressive responses 8 h into withdrawal. Dependent rats (black bar) exhibited a significant  
673 increase in the number of aggressive responses over the course of 10 trials compared with  
674 nondependent rats (gray bar) and naive rats (white bar). **(B)** Defensive responses 8 h into



675 withdrawal. No significant differences in the number of defensive responses were found between  
676 groups. \* $p < 0.05$ , dependent vs. naive; # $p < 0.05$ , dependent vs. nondependent.

677

678 **Figure 3.** Irritability-like behavior following 2 weeks of protracted abstinence from ethanol  
679 vapor in dependent rats. Rats underwent the bottle-brush test to assess aggressive and defensive  
680 responses. **(A)** Aggressive responses after 2 weeks of protracted abstinence. Dependent rats  
681 (black bar) exhibited a significant increase in the number of aggressive responses over the course  
682 of 10 trials compared with nondependent rats (gray bar) and naive rats (white bar). **(B)** Defensive  
683 responses after 2 weeks of protracted abstinence. No significant differences in the number of  
684 defensive responses were found between groups. \* $p < 0.05$ , dependent vs. naive; # $p < 0.05$ ,  
685 dependent vs. nondependent.

686

687 **Figure 4.** Escalation of ethanol intake and irritability-like behavior in ethanol-dependent rats 8 h  
688 into withdrawal from ethanol vapor. Rats were given CIE exposure to escalate ethanol intake  
689 relative to baseline. Escalated rats were then treated with vehicle or the CRF<sub>1</sub> receptor antagonist  
690 R121919 (10 mg/kg) 30 min prior to testing. The rats then underwent the bottle-brush test to  
691 assess aggressive and defensive responses. **(A)** Average of the last 3 days pre-vapor (baseline)  
692 and post-vapor (escalation) prior to testing irritability-like behavior. Dependent rats significantly  
693 escalated their ethanol intake relative to baseline (white bar) after CIE (post-vapor; black bar).  
694 **(B)** Aggressive responses. R121919-treated rats (black bar) exhibited a significant reduction of  
695 the number of aggressive responses over the course of 10 trials compared with vehicle-treated  
696 rats (white bar). **(C)** Defensive responses. No significant differences in the number of defensive  
697 responses were found between groups. \* $p < 0.05$ , R121919 vs. vehicle.

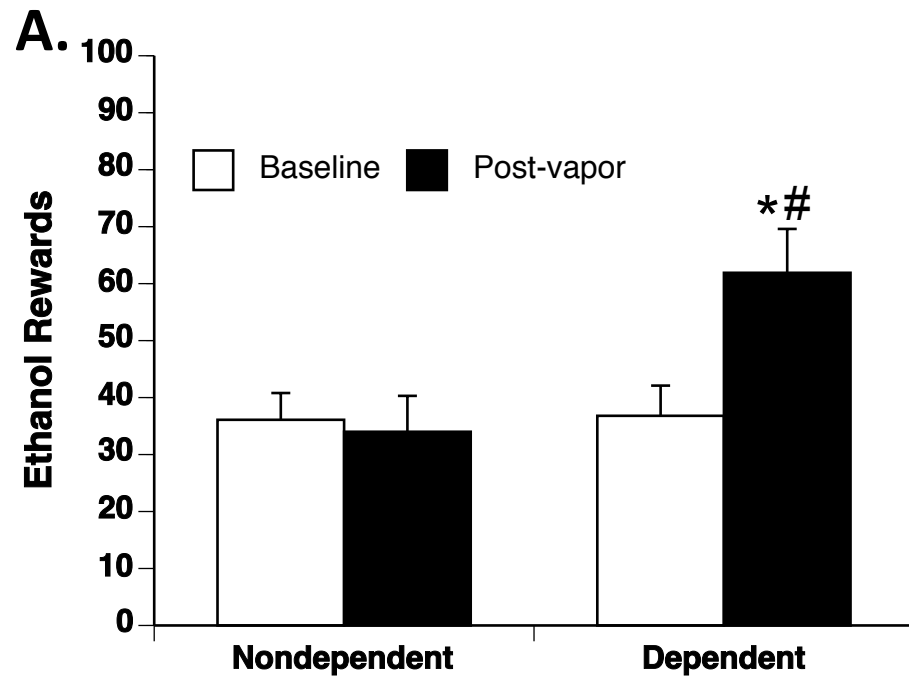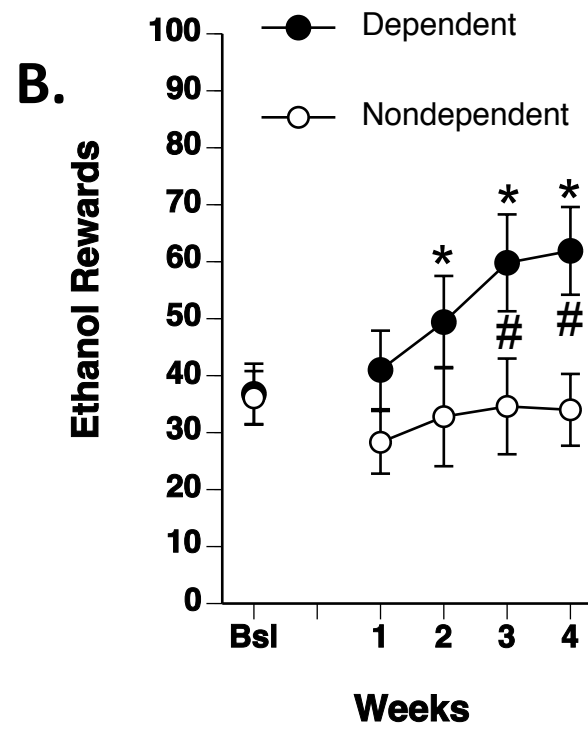

Figure 1

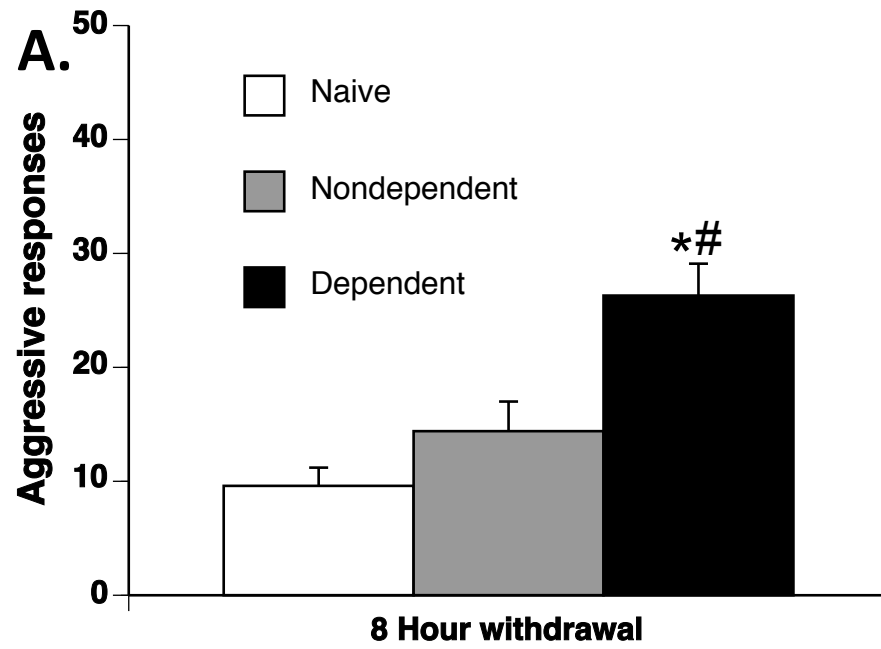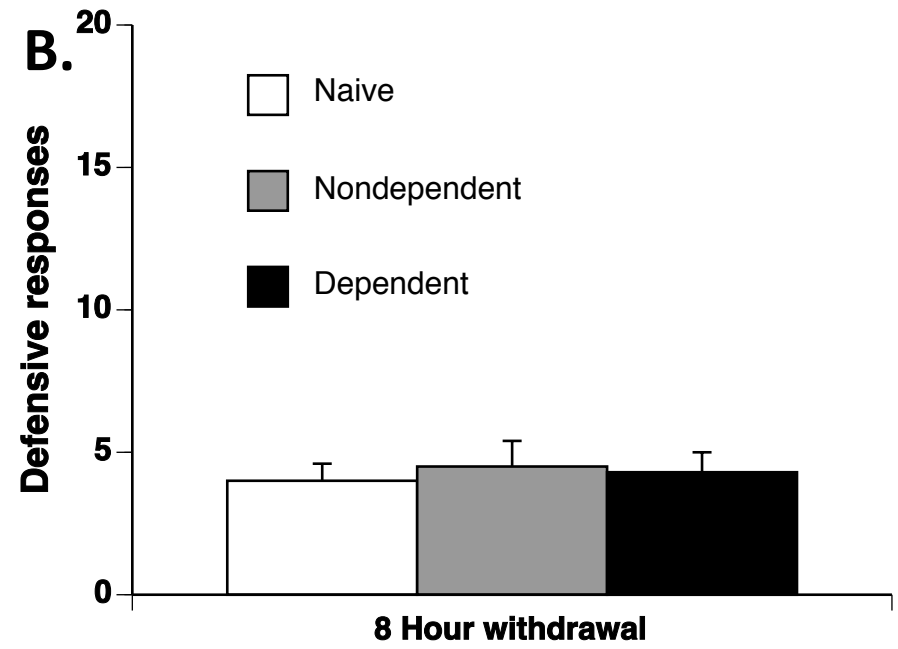

Figure 2

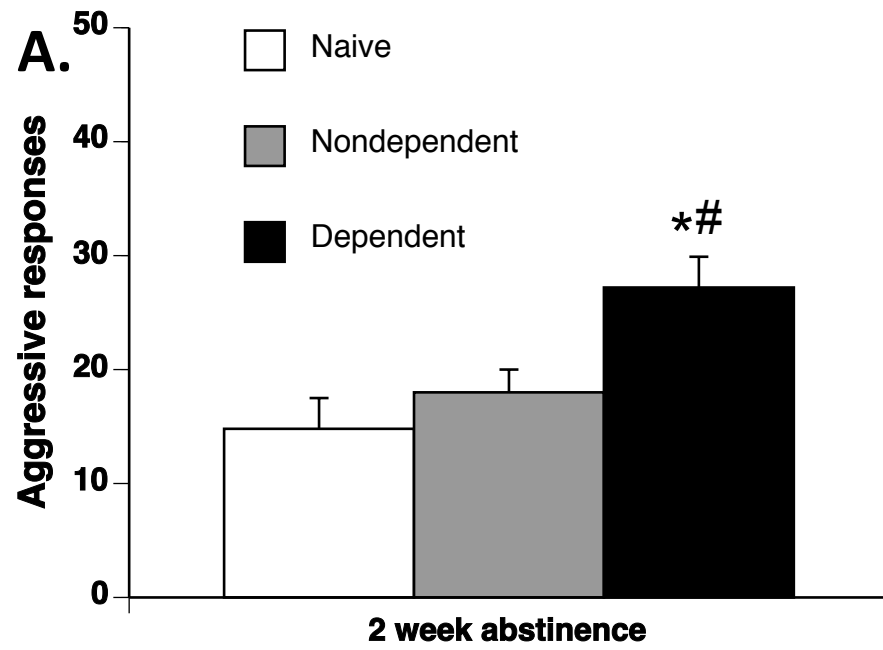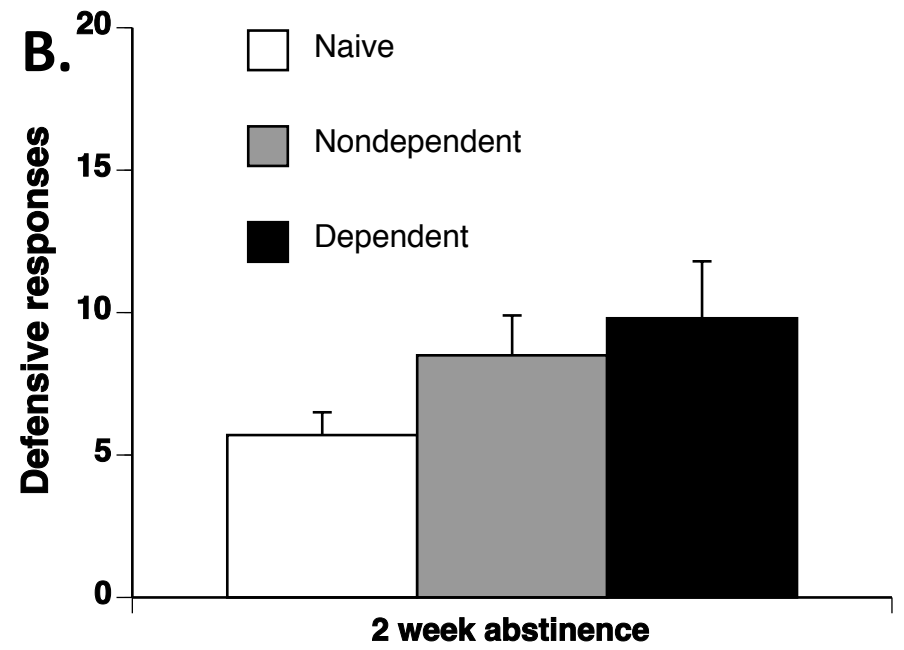

Figure 3

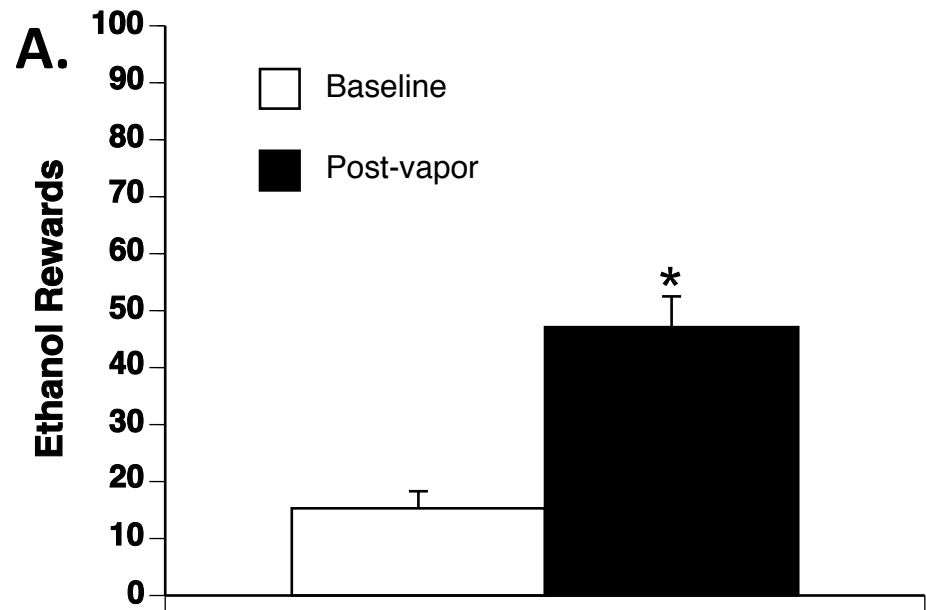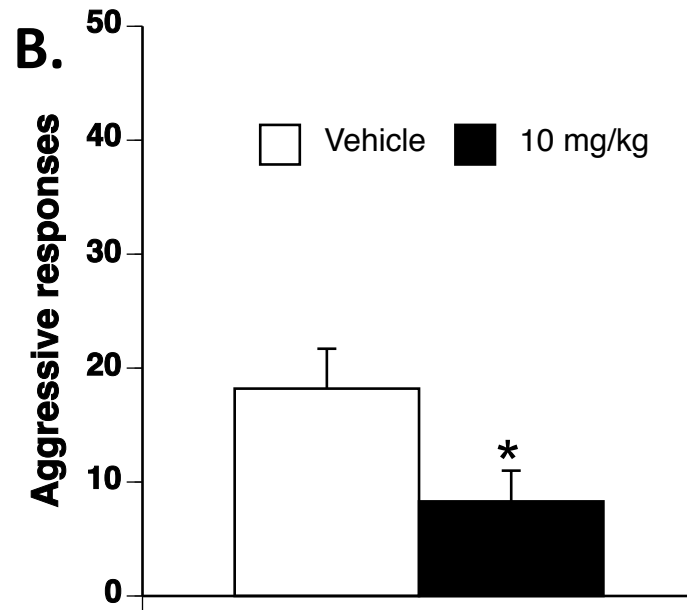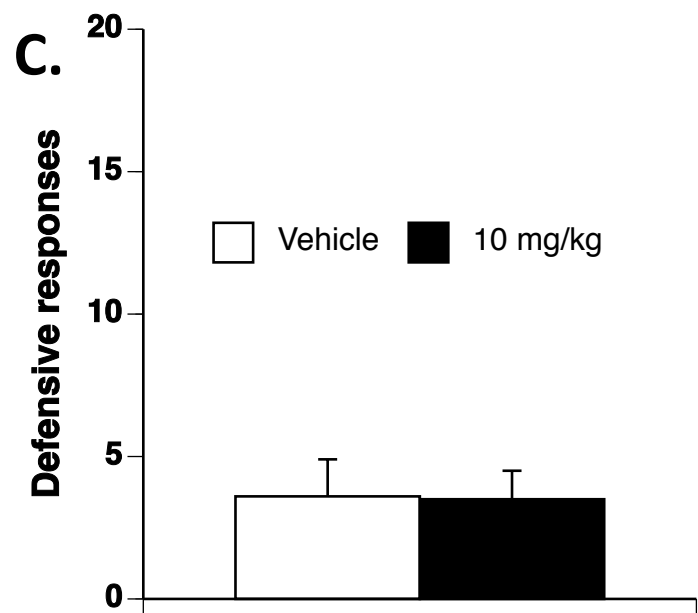

Figure 4
